# Supplementary material
Source: publisher figshare collection journal article supplement (https://gsapubs.figshare.com/ndownloader/files/30991279)
Supplement: Supplementary file 1 [file 30991279]

## Sheet: Sheet1
Particles on foam board				Particles on fixed-particle board	on grains
Grain number	θ (degrees)	D (mm)	Mass (g)	Grain number	D (mm)	θ (degrees)	Average θ (degrees)
1	21	60	269.9	1	67	37
2	15	41	200.5	1		26
3	17	58	277.5	1		39	34
4	22	64	335.3	2	83	35
5	23	68	291.5	2		42
6	22	63	524	2		36	37.6667
7	17	63	443.3	3	74	38
8	10	59	449.5	3		51
9	19	54	271.3	3		51	46.6667
10	24	70	433.3	4	59	30
11	13	57	427.5	4		37
12	17	65	360.5	4		19	28.6667
13	16	41	302.3	5	73	31
14	16	44	188.3	5		39
15	22	55	234.2	5		23	31
16	28	60	439.1	6	57	22
17	17	0	451.1	6		36
18	20	55	400.5	6		34	30.6667
19	29	58	316.2	7	72	25
20	20	46	212.2	7		31
21	13	53	317	7		22	26
22	20	53	308.8	8	59	42
23	22	54	337.9	8		58
24	18	60	328.1	8		36	45.3333
25	17	54	309.9	9	65	20
26	24	52	289.2	9		25
28	22	69	502.1	9		16	20.3333
				10	61	30
				10		34
				10		31	31.6667
				11	80	25
				11		26
				11		35	28.6667
				12	71	30
				12		36
				12		22	29.3333
				13	65	45
				13		21
				13		35	33.6667
				14	70	33
				14		45
				14		36	38
				15	51	30
				15		26
				15		35	30.3333

## Sheet: G49286
Sun, Z., et al., 2021, Formation of low-gradient bedrock chutes by dry rockfall on planetary surfaces: Geology, https://doi.org/10.1130/G49286.1
